# Supplementary material
Source: publisher site journal article supplement (https://www.dovepress.com/article/483637)
Supplement: Supplementary file 1 [file get_supplementary_file.php]

**Related diseases excluded:**

**acute or chronic infection：**Helicobacter pylori infection, Infective endocarditis, intracranial infection, Lower respiratory infection, Upper respiratory infection, Urinary tract infection, lung infection, lung infection virus, lung infection bacterial, lung infection fungus, lung infection other. Sepsis.

**acute coronary disease:** Acute coronary syndrome

**heart failure:** Congestive heart failure,

**cancer:** Biliary tract carcinoma, bladder carcinoma, breast carcinoma, cervical carcinoma, colon carcinoma, endometrial carcinoma, esophagus carcinoma, carcinoma of kidney, lung cancer, ovarian carcinoma, Pancreatic carcinoma, prostatic carcinoma, gastric carcinoma, thyroid carcinoma, carcinoma of ureter, Gastrointestinal tumor, Hemo. malignant. tumor, Hepatic malignancy, lymphoma, Malignant tumor, Metastatic solid tumor, Solid tumor without metastasis, Tumor without metastasis (exclude if > 5 y from diagnosis).

**Surgery:** Coronary artery bypass surgery

**thyroid disease:** Hyperthyroidism, Hypothyroidism, thyroid carcinoma.

**hematological diseases affecting blood cell count:** leukemia, Aplastic anemia

**kidney injury from other factors:** Hepatorenal syndrome, Acute kidney injury, Glomerular disease, Hereditary nephropathy, Renal tubule-interstitial disease, carcinoma of kidney, kidney transplant, kidney tuberculosis, nephrotic syndrome

autoimmune diseases: Connective tissue disease，Systemic lupus erythematosus，Rheumatoid arthritis

**taking drugs affecting lymphocyte and neutrophil counts:** glucocorticoids，immunosuppressant
